# Supplementary material for: Ecotoxicological and behavioural responses of aquatic model organisms to the MosChito raft bioinsecticide delivery system
Source: Research Square preprint supplement (doi:10.21203/rs.3.rs-8018093/v1), 2025-11-24
Supplement: Supplementary file 1 [file b9600a8e432e1e97579744e4.pdf]

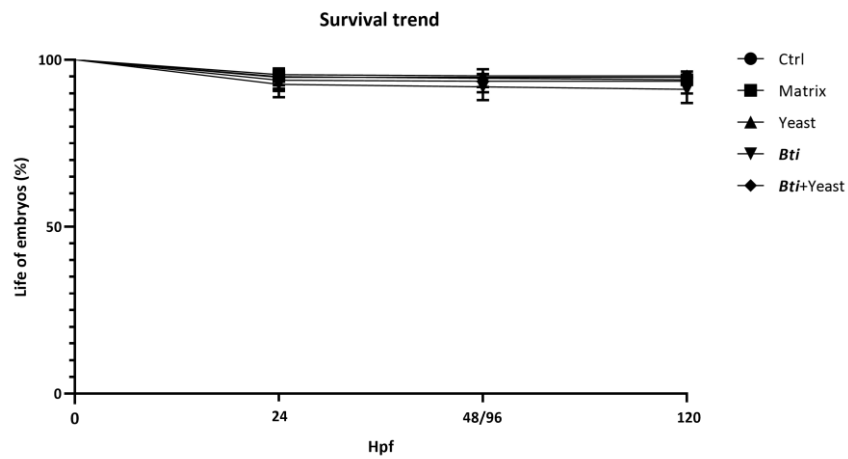

**Sup.Fig. 1. Impact of MosChito rafts on the survival rate of zebrafish embryos over 120-hour exposure.**

Treatment groups: control (Ctrl); empty hydrogel (Matrix); hydrogel with yeast (Yeast); hydrogel with VectoBac® 12AS (*Bti*); hydrogel with yeasts and VectoBac® 12AS (*Bti*+Yeast). The Data are presented as mean (95% CI) of three independent experiments.

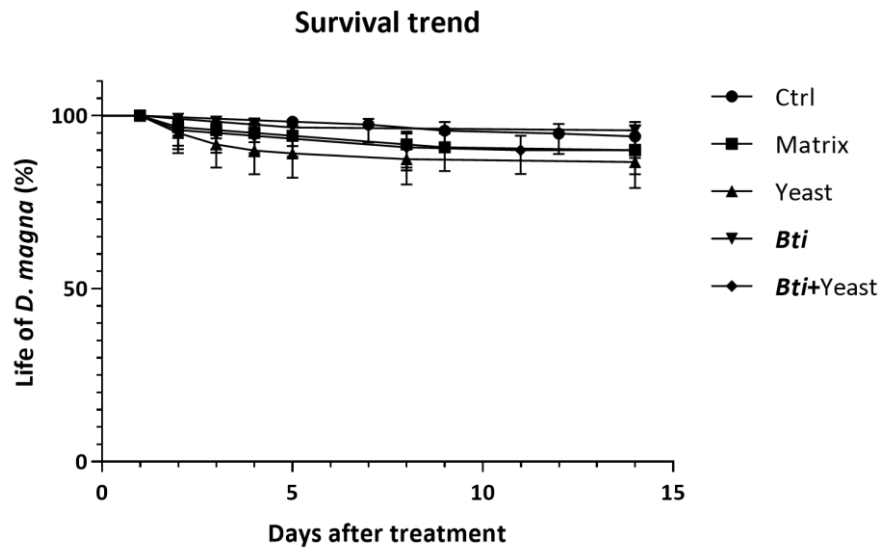

**Sup.Fig. 2. Impact of MosChito rafts on the survival rate of *D. magna* over 14 days exposure.** Treatment groups: control (Ctrl); empty hydrogel (Matrix); hydrogel with yeast (Yeast); hydrogel with VectoBac® 12AS (*Bti*); hydrogel with yeasts and VectoBac® 12AS (*Bti*+Yeast). The Data are presented as mean (95% CI) of three independent experiments.

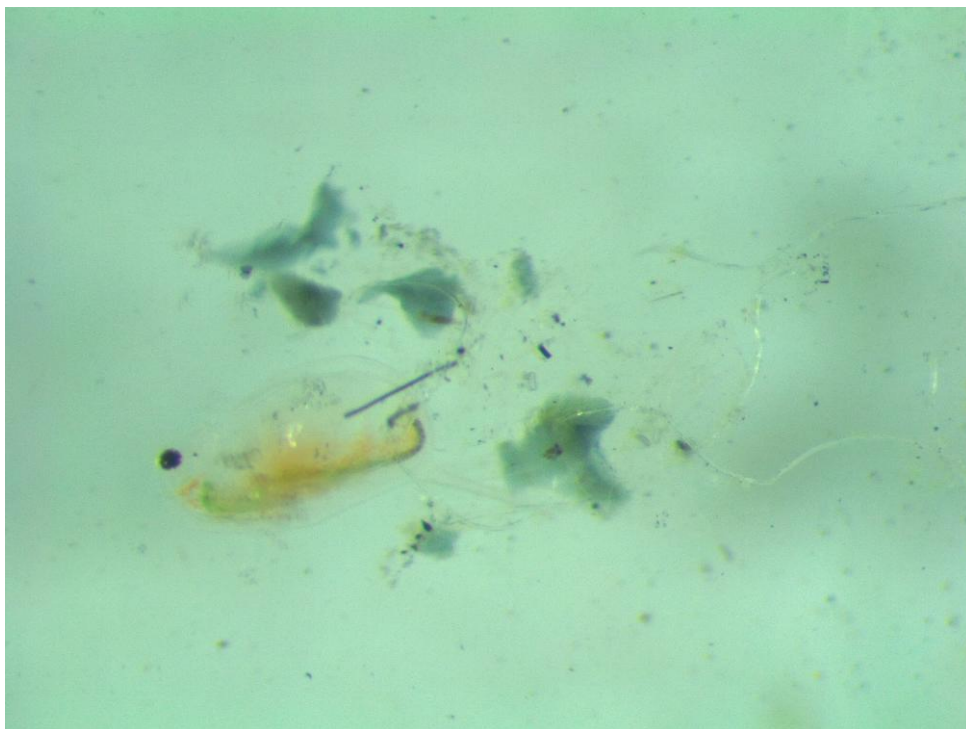

**Sup.Fig. 3. Daphnid specimen, used during the test, with antennae stuck to the raft matrix (blue debris).**

|                | One-Way ANOVA                         | Tukey's multiple comparisons test        |
|----------------|---------------------------------------|------------------------------------------|
| <b>Fig. 3A</b> | $F_{(4, 324)} = 2,726$ $P=0,0294$ *   | Ctrl vs. Matrix $P = 0,3028$             |
|                |                                       | Ctrl vs. Yeast $P = 0,7129$              |
|                |                                       | <i>Ctrl vs. Bti</i> $P= >0,9999$         |
|                |                                       | <i>Ctrl vs. Bti+Yeast</i> $P = 0,0528$ * |
|                |                                       | Matrix vs. Yeast $P = 0,9634$            |
|                |                                       | <i>Matrix vs. Bti</i> $P= 0,3813$        |
|                |                                       | <i>Matrix vs. Bti+Yeast</i> $P= 0,9496$  |
|                |                                       | <i>Yeast vs. Bti</i> $P = 0,7942$        |
|                |                                       | <i>Yeast vs. Bti+Yeast</i> $P = 0,6169$  |
|                |                                       | <i>Bti vs. Bti+Yeast</i> $P = 0,0771$    |
| <b>Fig. 3B</b> | $F_{(4, 324)} = 3,564$ $P= 0,0073$ ** | Ctrl vs. Matrix $P= 0,0057$ **           |
|                |                                       | Ctrl vs. Yeast $P= 0,1294$               |
|                |                                       | <i>Ctrl vs. Bti</i> $P= 0,4804$          |
|                |                                       | <i>Ctrl vs. Bti+Yeast</i> $P= 0,0303$ *  |
|                |                                       | Matrix vs. Yeast $P= 0,8115$             |
|                |                                       | <i>Matrix vs. Bti</i> $P= 0,3631$        |
|                |                                       | <i>Matrix vs. Bti+Yeast</i> $P= 0,9687$  |
|                |                                       | <i>Yeast vs. Bti</i> $P= 0,9492$         |
|                |                                       | <i>Yeast vs. Bti+Yeast</i> $P= 0,9885$   |
|                |                                       | <i>Bti vs. Bti+Yeast</i> $P= 0,7268$     |

**Sp.Tab. 1. Statistical results obtained from the analysis of *D. magna* swimming behavior.**  
(3A) Total distance moved(3B) Mobility

|        | One-Way ANOVA                        | Tukey's multiple comparisons test             |
|--------|--------------------------------------|-----------------------------------------------|
| Fig 4A | $F_{(4, 25)} = 2,961$ $P = 0,0394^*$ | Ctrl vs. Matrix $P = 0,9427$                  |
|        |                                      | Ctrl vs. Yeast $P = 0,4517$                   |
|        |                                      | Ctrl vs. <i>Bti</i> $P = 0,1294$              |
|        |                                      | Ctrl vs. <i>Bti</i> +Yeast $P = 0,0468^*$     |
|        |                                      | Matrix vs. Yeast $P = 0,8736$                 |
|        |                                      | Matrix vs. <i>Bti</i> $P = 0,4382$            |
|        |                                      | Matrix vs. <i>Bti</i> +Yeast $P = 0,2057$     |
|        |                                      | Yeast vs. <i>Bti</i> $P = 0,9363$             |
|        |                                      | Yeast vs. <i>Bti</i> +Yeast $P = 0,7132$      |
|        |                                      | <i>Bti</i> vs. <i>Bti</i> +Yeast $P = 0,9871$ |

**Sp.Tab. 2. Statistical results obtained from the analysis of *D. magna* biomarkers.**  
(4A) Reactive oxygen species (ROS) levels
